# Supplementary material
Source: HighWire-hosted journal article supplement (https://jnm.snmjournals.org/highwire/filestream/94524/field_highwire_adjunct_files/0/126839_Supplemental_Data.pdf)
Supplement: 126839_Supplemental_Data.pdf [file 126839_Supplemental_Data.pdf]

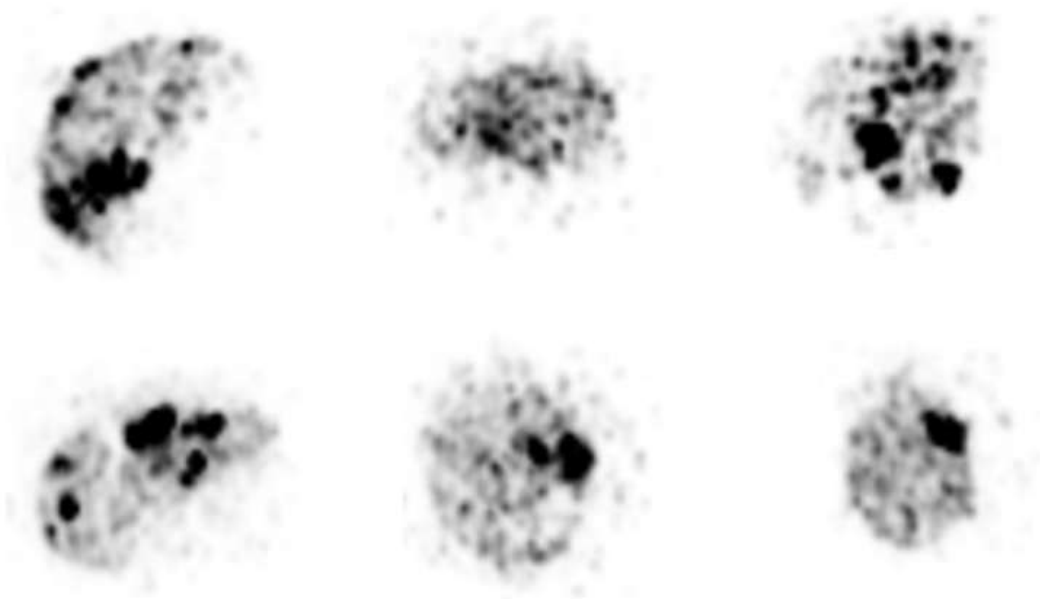

Supplemental Figure 1.  $^{90}\text{Y}$  TOF-PET transverse slice in 6 randomly selected patients post glass microspheres radioembolization aiming to deliver 120Gy to the targeted liver tissue. Saturated regions correspond to tumours.
